# Supplementary material for: The Determinants of Conspiracy Beliefs Related to the COVID-19 Pandemic in a Nationally Representative Sample of Internet Users
Source: MDPI journal article supplement (doi:10.3390/ijerph17217818), 2020-10-26
Supplement: s1 [file s1]

## Supplementary Materials

**Table S1.** The distribution of responses to items asking about conspiracy beliefs related to COVID-19.

| Items related to conspiracy beliefs                                                                              | I decidedly do not agree<br>% (n) | I do not agree<br>% (n) | difficult to say<br>% (n) | I agree<br>% (n) | I decidedly agree<br>% (n) |
|------------------------------------------------------------------------------------------------------------------|-----------------------------------|-------------------------|---------------------------|------------------|----------------------------|
| Coronavirus responsible for the COVID-19 pandemic is a result of genetic manipulations carried out by man.       | 8.48 (85)                         | 9.68 (97)               | 36.03 (361)               | 27.15 (272)      | 18.66 (187)                |
| The coronavirus news is made up to spread panic and to achieve a political aim.                                  | 10.18 (102)                       | 15.47 (155)             | 32.63 (327)               | 23.05 (231)      | 18.66 (187)                |
| Governments treat a COVID-19 pandemic as a pretext for the introduction of total surveillance of the population. | 5.19 (52)                         | 8.58 (86)               | 30.14 (302)               | 32.73 (328)      | 23.35 (234)                |

**Table S2.** Spearman correlations for independent variables used in regression models.

|                       | 1       | 2       | 3        | 4        | 5       | 6        | 7        | 8       |
|-----------------------|---------|---------|----------|----------|---------|----------|----------|---------|
| 1. Health literacy    | 1       |         |          |          |         |          |          |         |
| 2. eHealth literacy   | 0.403** | 1       |          |          |         |          |          |         |
| 3. Age                | 0.169** | 0.086** | 1        |          |         |          |          |         |
| 4. Gender             | -0.01   | -0.006  | 0.011    | 1        |         |          |          |         |
| 5. Place of residence | -0.017  | -0.004  | 0.051    | -0.025   | 1       |          |          |         |
| 6. Education level    | -0.047  | 0.023   | 0.126**  | -0.039   | 0.011   | 1        |          |         |
| 7. Marital status     | 0.079*  | 0.049   | 0.592**  | -0.124** | -0.01   | 0.081**  | 1        |         |
| 8. Vocational status  | -0.004  | -0.064* | -0.083** | -0.076*  | -0.073* | -0.173** | -0.114** | 1       |
| 9. Net income         | -0.045  | -0.023  | -0.028   | 0.090**  | 0.101** | 0.113**  | -0.036   | -0.067* |

\*  $p < 0.05$ , \*\*  $p < 0.01$ .
